# Supplementary material for: Degradation of 2-Naphthol in Aqueous Solution by Electro-Fenton System with Cu-Supported Stainless Steel Electrode
Source: MDPI journal article supplement (doi:10.3390/w14071007), 2022-03-22
Supplement: s1 [file s1]

Archive with 1 entries (1 files):
- water-1629570-supplementary.pdf
