# Supplementary material for: Degradation of 2-Naphthol in Aqueous Solution by Electro-Fenton System with Cu-Supported Stainless Steel Electrode
Source: MDPI journal article supplement (doi:10.3390/w14071007), 2022-03-22
Supplement: s1 [file s1 › water-1629570-supplementary.pdf]

# Supplementary Files

#1: The stability of the Cu-supported stainless steel electrode

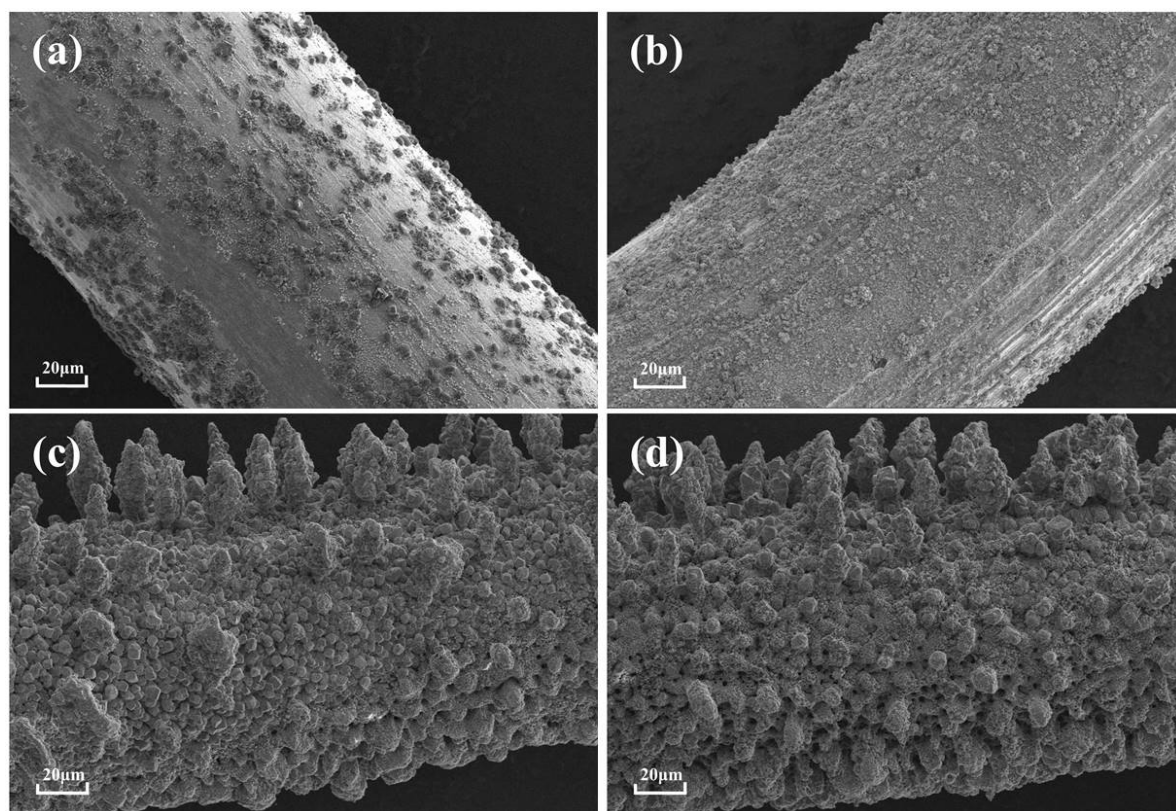

Figure S1. The stability of the Cu-supported stainless steel electrode: (a) Electro-Fenton reaction for 100 minutes, firstly used; (b) Electro-Fenton reaction for 200 minutes, secondly used; (c) Electro-Fenton reaction for 300 minutes, thirdly used; (d) Electro-Fenton reaction for 400 minutes, fourthly used.

#2: The XRD data for the Cu-SSE.

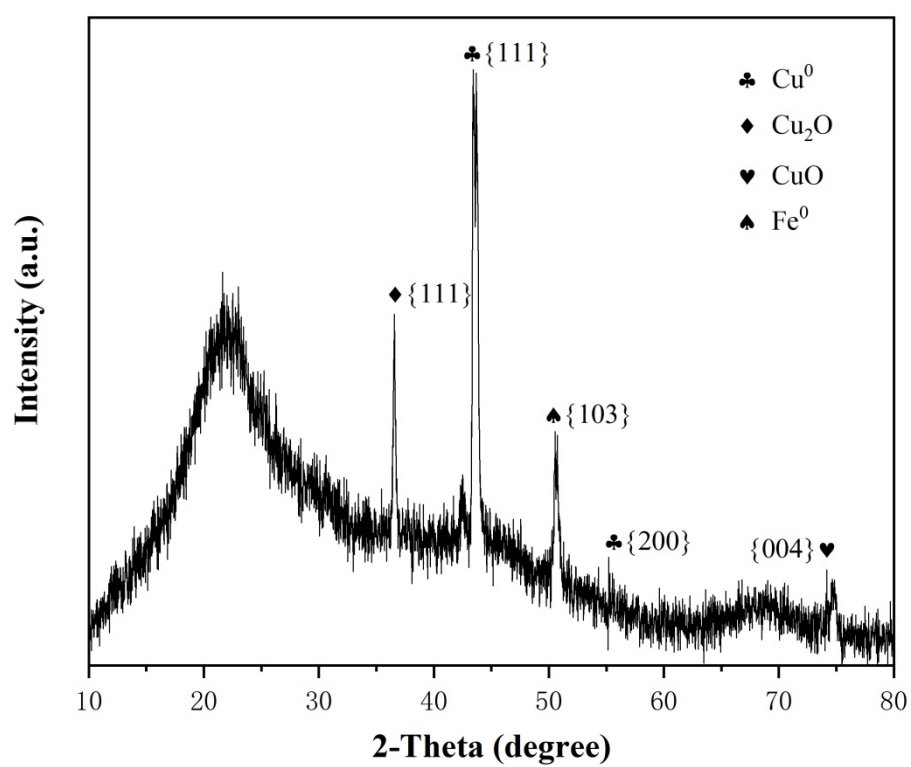

Figure S2. The XRD result of Cu-SSE
